# Supplementary material for: Pressure-induced shear and interlayer expansion in Ti3C2 MXene in the presence of water
Source: PubMed Central journal article supplement — Sci Adv. 2018 Jan 12;4(1):eaao6850. doi: 10.1126/sciadv.aao6850 (PMC5766327; doi:10.1126/sciadv.aao6850), 2018-01-12
Supplement: aao6850_SM.pdf [file aao6850_SM.pdf]

## Supplementary Materials for **Pressure-induced shear and interlayer expansion in $\text{Ti}_3\text{C}_2$ MXene in the presence of water**

Michael Ghidui, Sankalp Kota, Vadym Drozd, Michel W. Barsoum

Published 12 January 2018, *Sci. Adv.* **4**, eaao6850 (2018)

DOI: 10.1126/sciadv.aao6850

### **This PDF file includes:**

- fig. S1. Full diffraction pattern of  $\text{Ti}_3\text{C}_2\text{T}_x$  compressed in excess  $\text{H}_2\text{O}$  at a pressure of 2 GPa.
- fig. S2. Full diffraction pattern of  $\text{Ti}_3\text{C}_2\text{T}_x$  compressed in excess  $\text{H}_2\text{O}$  at a pressure of 3 GPa.
- fig. S3. Analysis of material ejected from the side of the die.

## Supplementary Materials

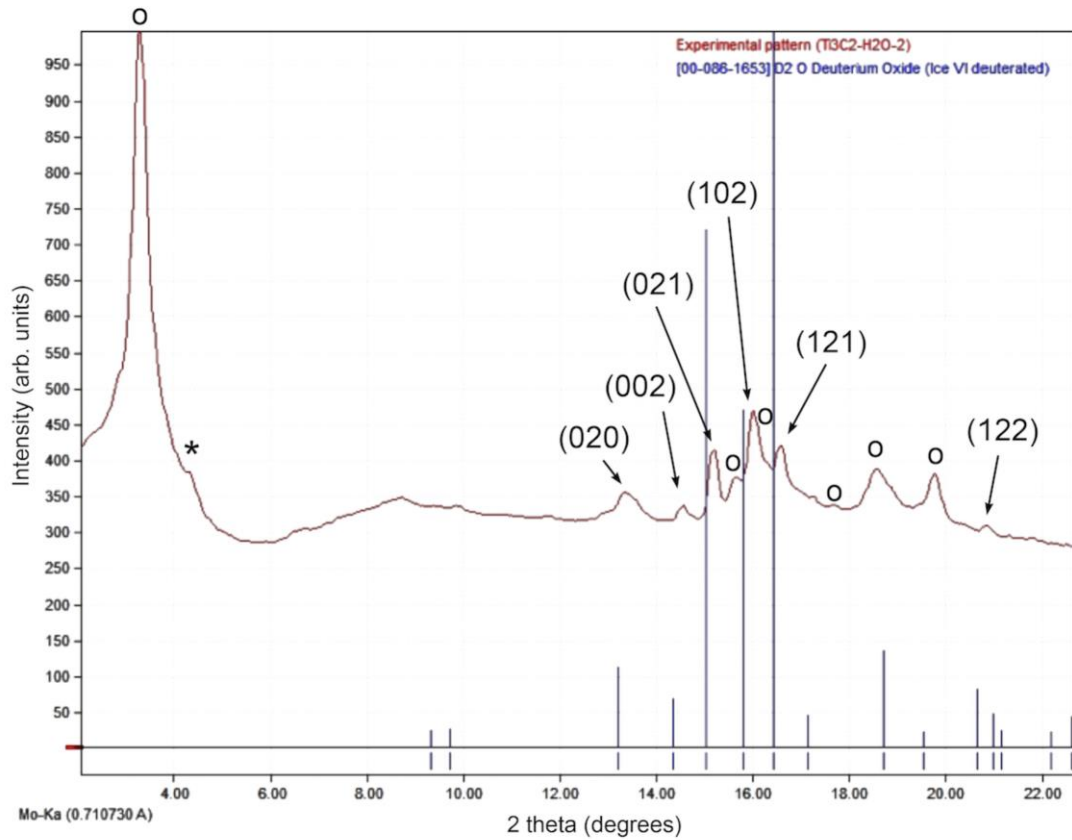

**fig S1. Full diffraction pattern of  $\text{Ti}_3\text{C}_2\text{T}_x$  compressed in excess  $\text{H}_2\text{O}$  at a pressure of 2 GPa.** The asterisk denotes the (002) peak of a small amount of  $\text{Ti}_3\text{AlC}_2$  impurity. Open circles denote reflections from the MXene  $\text{Ti}_3\text{C}_2\text{T}_x$ , in order from left to right:  $\{00l\}$ , (011), (013), (015), (016), (017). Lines represent the standard of  $\text{D}_2\text{O}$  Ice VI; the experimental peaks are shifted to higher angle because the standard is at 1.1 GPa and the experimental pattern is at 2 GPa. JCPDS standard for Ice-VI (#086-16531; 225K, 1.1GPa). Ice-VI reflections are indexed.

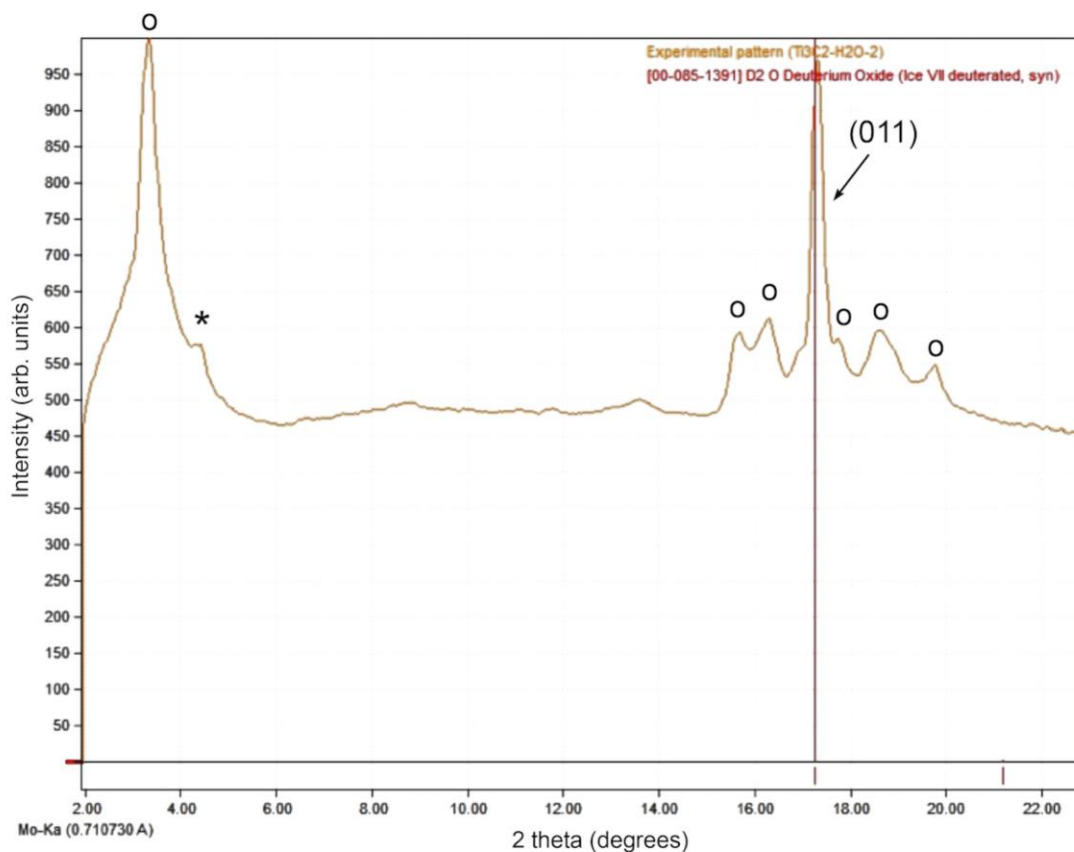

**fig S2. Full diffraction pattern of  $\text{Ti}_3\text{C}_2\text{T}_x$  compressed in excess  $\text{H}_2\text{O}$  at a pressure of 3 GPa.** The asterisk denotes the (002) peak of a small amount of  $\text{Ti}_3\text{AlC}_2$  impurity. Open circles denote reflections from the MXene  $\text{Ti}_3\text{C}_2\text{T}_x$ , in order from left to right:  $\{00l\}$ , (011), (013), (015), (016), (017). Lines represent the standard of  $\text{D}_2\text{O}$  Ice VII; the experimental peaks are shifted to higher angle because the standard is at 2.6 GPa and the experimental pattern is at 3 GPa. JCPDS standard for Ice-VII (#085-1391; 296K, 2.6GPa). Ice-VII reflections are indexed.

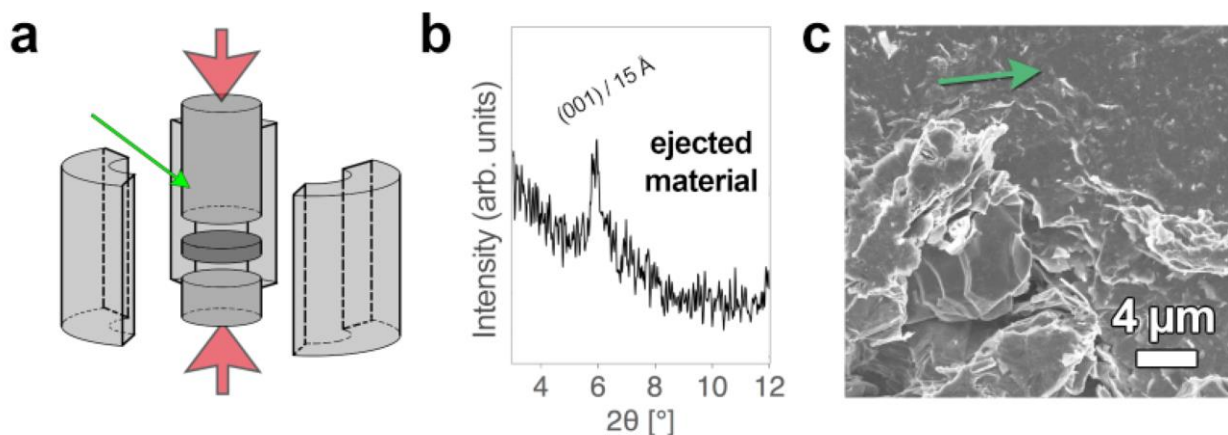

**fig S3. Analysis of material ejected from the side of the die.** (A) Schematic showing the setup of disc pressing in a steel die with 3-part walls. The large arrows indicate the direction of the uniaxial pressure, and the small arrow shows the location of MXene collected that was ejected from the main pressing area and up along the inside of the die walls. The MXene disc is shown in dark grey at the center. (B) XRD of the same material, showing the same expansion as observed on the surface of the disc. (C) SEM image of the collected material, showing large areas with nanosheets that have slipped relative to each other into a turbostratically-disordered surface.
